# Supplementary material
Source: PubMed Central journal article supplement (PMC9463207)
Supplement: 277_2022_4924_MOESM1_ESM.pdf [file 277_2022_4924_MOESM1_ESM.pdf]

**Article title**

Early administration of remdesivir plus convalescent plasma therapy is effective to treat COVID-19 pneumonia in B-cell depleted patients with hematological malignancies

**Journal name**

Annals of Hematology

**Author names**

<sup>1,2,#</sup> Ferenc Magyar, <sup>1,2,#</sup> László Imre Pinczés, <sup>1,2</sup> Edit Páyer, <sup>1,2</sup> Katalin Farkas, <sup>3</sup> Szilvia Ujfalusi, <sup>3</sup> Ágnes Diószegi, <sup>4</sup> Máté Sik, <sup>1</sup> Zsófia Simon, <sup>5</sup> Gergely Nagy, <sup>6</sup> Zsuzsanna Hevessy, <sup>6,&</sup> Béla Nagy Jr., <sup>1,2,&</sup> Árpád Illés

# These first authors equally contributed to this work.

& These last authors equally contributed to this work.

**Affiliation**

<sup>1</sup> Division of Hematology, Department of Internal Medicine, Faculty of Medicine, University of Debrecen, Debrecen, Hungary; <sup>2</sup> Doctoral School of Clinical Medicine, University of Debrecen, Debrecen, Hungary; <sup>3</sup> Division of Endocrinology, Department of Internal Medicine, Faculty of Medicine, University of Debrecen, Debrecen, Hungary; <sup>4</sup> Department of Radiology, Faculty of Medicine, University of Debrecen, Debrecen, Hungary; <sup>5</sup> Department of Emergency Medicine, Faculty of Medicine, University of Debrecen, Debrecen, Hungary; <sup>6</sup> Department of Laboratory Medicine, Faculty of Medicine, University of Debrecen, Debrecen, Hungary

**Corresponding author**

László Imre Pinczés      pinczes.laszlo.imre@med.unideb.hu

|                                             | ANC<br>(G/L) | ALC<br>(G/L) | IgG<br>(g/L) | IgA<br>(g/L) | IgM<br>(g/L) | CD3+<br>(cell/uL) | CD4+<br>(cell/uL) | CD8+<br>(cell/uL) | CD4/CD8<br>(ratio) | CD56+/CD3-<br>(cell/uL) | CD19+<br>(cell/uL) |
|---------------------------------------------|--------------|--------------|--------------|--------------|--------------|-------------------|-------------------|-------------------|--------------------|-------------------------|--------------------|
| <b>Patient #1</b>                           | 2.32         | 0.56         | 7.87         | 0.61         | 0            | 348               | 67                | 277               | 0.24               | 26                      | 0                  |
| <b>Patient #2</b>                           | 2.01         | 0            | 7.5          | 0.8          | 0.26         | 273               | 169               | 101               | 1.67               | 222                     | 0                  |
| <b>Patient #3</b>                           | 0.81         | 0            | 0            | 0            | 0            | 371               | 265               | 102               | 2.60               | 34                      | 77.7               |
| Patient #4                                  | 1.84         | 0.84         | 4.61         | 0            | 0.33         | 105               | 42                | 62                | 0.67               | 16                      | 0                  |
| <b>Patient #5</b>                           | 7.4          | 1.34         | 2.04         | 0.16         | 0.17         | 537               | 165               | 339               | 0.49               | 102                     | 0                  |
| <b>Patient #6</b>                           | 1.19         | 0.80         | 2.61         | 0            | 0            | 538               | 255               | 282               | 0.90               | 16                      | 0                  |
| Patient #7                                  | 1.75         | 0.93         | n/a          | n/a          | n/a          | 455               | 309               | 128               | 2.41               | 18                      | 21                 |
| Patient #8                                  | 5.87         | 0.15         | 11.5         | 0            | 0            | 108               | 43                | 58                | 0.74               | 15                      | 23                 |
| <b>Patient #9</b>                           | 3.31         | 0.24         | 10.00        | 0            | 1.1          | 23                | 18                | 5                 | 3.81               | 6                       | 0                  |
| <b>Patient #10</b>                          | 4.35         | 0.41         | n/a          | n/a          | n/a          | 187               | 53                | 133               | 0.39               | 26                      | 0                  |
| <b>Patient #11</b>                          | 9.25         | 0.37         | 3.30         | 0            | 0            | 215               | 55                | 159               | 0.35               | 3                       | 0                  |
| Patient #12                                 | 4.15         | 5.44         | 8.63         | 1.62         | 0.21         | 1613              | 1029              | 501               | 2.060              | 250                     | 51.7               |
| <b>Patient #13</b>                          | 0.38         | 0.48         | 13.9         | 2.3          | 0.55         | 508               | 68                | 388               | 0.17               | 24                      | 0                  |
| <b>Patient #14</b>                          | 3.88         | 1.11         | 4.03         | 0.97         | 0            | 297               | 111               | 171               | 0.65               | 101                     | 28.7               |
| Patient #15                                 | 8.83         | 0.34         | 14.1         | 1.8          | 1.98         | 306               | 188               | 106               | 1.78               | 87                      | 9                  |
| Patient #16                                 | 0.27         | 0            | n/a          | n/a          | n/a          | 1125              | 673               | 385               | 1.75               | 193                     | 0                  |
| <b>Patient #17</b>                          | 2.09         | 0.47         | 7.8          | 0.8          | 0.49         | 85                | 41                | 43                | 0.94               | 33                      | 6.7                |
| <b>Patient #18</b>                          | 3.62         | 0.73         | 10.8         | 1.3          | 0.64         | 499               | 243               | 231               | 1.050              | 68                      | 0                  |
| Patient #19                                 | 3.92         | 1.93         | 5.19         | 1.14         | 0.38         | 382               | 104               | 243               | 0.43               | 20.00                   | 9                  |
| <b>Patient #20</b>                          | 1.06         | 0.89         | 7.40         | 0.90         | 0            | 591               | 113               | 471               | 0.24               | 24                      | 0                  |
| <b>Normal value</b>                         | 1.68-8       | 0.9-3.1      | 7-16         | 0.7-4        | 0.4-2.3      | 550-1800          | 310-1150          | 140-850           | -                  | 80-690                  | < 80               |
| <b>All patients</b>                         |              |              |              |              |              |                   |                   |                   |                    |                         |                    |
| Median                                      | 2.815        | 0.52         | 7.5          | 0.8          | 0.21         | 359.5             | 112               | 165               | 0.82               | 26                      | 0                  |
| Min                                         | 0.27         | 0            | 0            | 0            | 0            | 23                | 18                | 5                 | 0.17               | 3                       | 0                  |
| Max                                         | 9.25         | 5.44         | 14.1         | 2.3          | 1.98         | 1613              | 1029              | 501               | 3.81               | 250                     | 77.7               |
| <b>Patients receiving anti-CD20 therapy</b> |              |              |              |              |              |                   |                   |                   |                    |                         |                    |
| Median                                      | 2.32         | 0.48         | 7.45         | 0.705        | 0.085        | 348               | 111               | 171               | 0.65               | 26                      | 0                  |
| Min                                         | 0.38         | 0            | 0            | 0            | 0            | 23                | 18                | 5                 | 0.17               | 3                       | 0                  |
| Max                                         | 9.25         | 1.34         | 13.9         | 2.3          | 1.1          | 591               | 265               | 471               | 3.81               | 222                     | 77.7               |
| <b>Patients without anti-CD20 therapy</b>   |              |              |              |              |              |                   |                   |                   |                    |                         |                    |
| Median                                      | 3.92         | 0.84         | 8.63         | 1.14         | 0.33         | 382               | 188               | 128               | 1.75               | 20                      | 9                  |
| Min                                         | 0.27         | 0            | 4.61         | 0            | 0            | 105               | 42                | 58                | 0.43               | 15                      | 0                  |
| Max                                         | 8.83         | 5.44         | 14.1         | 1.8          | 1.98         | 1613              | 1029              | 501               | 2.41               | 250                     | 51.7               |

**Online Resource 1** Baseline absolute neutrophil and lymphocyte counts, immunoglobulin G, A and M levels, T-cell (CD3+, CD4+, CD8+, CD4+/CD8+), NK-cell (CD56+/CD3-) and B-cell (CD19+) compartments of the peripheral blood at COVID-19 diagnosis. Data of anti-CD20 exposed patients is indicated in bold.

Abbreviations: ANC, absolute neutrophil count; ALC, absolute lymphocyte count; Ig, immunoglobulin

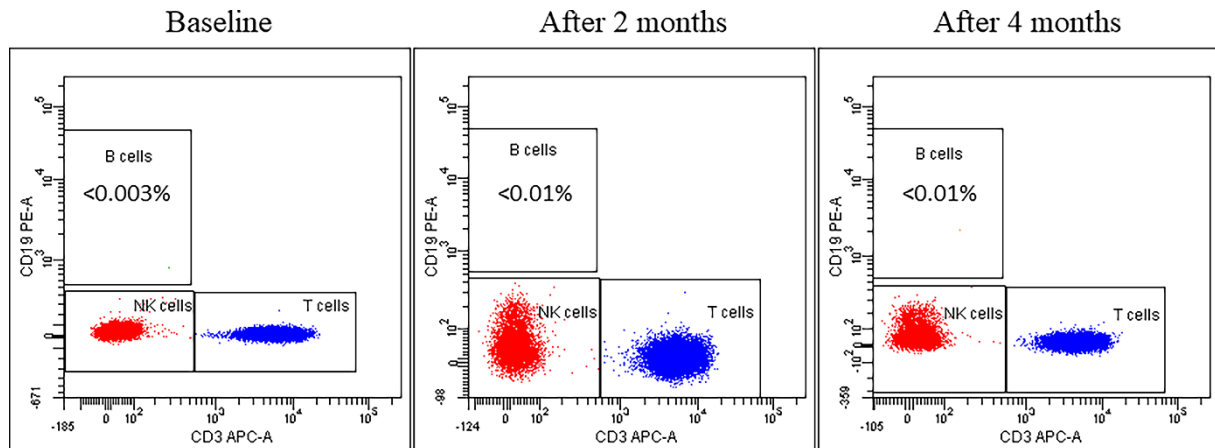

**Online Resource 2** Evaluation of the ratio of peripheral B-cells in a COVID-19 patient with hematological malignancy by flow cytometry. Lymphocyte subpopulations were analyzed based on CD19-PE and CD3-APC positivities (Becton Dickinson) and the percentage of B-cells was determined in case of anti-CD20 therapy and after 2 and 4 months on a FACSanto II flow cytometer. No detectable B-cell population was observed at any time point. During the flow cytometric analysis of the samples, 500.000 cells were collected with a sensitivity of 10/500.000, while 100.000 cells were studied in the follow-up samples showing a sensitivity of 10/100.000.
